# Supplementary material for: Evidence for a common evolutionary rate in metazoan transcriptional networks
Source: eLife. 2015 Dec 18;4:e11615. doi: 10.7554/eLife.11615 (PMC4764585; doi:10.7554/eLife.11615)
Supplement: Figure 3—source data 1. — DOI: http://dx.doi.org/10.7554/eLife.11615.010 [file elife-11615-fig3-data1.xlsx]

## Sheet: Sheet1
Figure 3 - source data 1 | Accession numbers used in RNA-seq analyses.
Species	Accession
M. musculus domesticus (C57BL/6)	ERR185942
M. musculus domesticus (CD1)	SRR908295
G. gallus (red junglefowl)	SRR306720
G. gallus (broiler)	SRR998879
D. melanogaster	SRR166808
D. melanogaster	SRR030231
M. castaneus	ERR120692
M. spretus	ERR476403
R. norvegicus	SRR1178064
H. sapiens	ENCFF283RUU,ENCFF187OKV
G. gorilla	SRR306809
D. simulans	SRR166812
D. yakuba	SRR166821
D. ananassae	SRR166825
D. pseudoobscura	SRR166829
M. gallopavo	SRR1334841
A. platyrhynchos	SRR064720
F. albicollis	ERR168726,ERR168727,ERR168728,ERR168729,ERR168730
*’,’ across multiple accession numbers indicates that these accession numbers were concatenated to form a single sample, otherwise only one accession number was used as a sample
