# Supplementary material for: Evidence for a common evolutionary rate in metazoan transcriptional networks
Source: eLife. 2015 Dec 18;4:e11615. doi: 10.7554/eLife.11615 (PMC4764585; doi:10.7554/eLife.11615)
Supplement: Figure 4—source data 1. — DOI: http://dx.doi.org/10.7554/eLife.11615.013 [file elife-11615-fig4-data1.xlsx]

## Sheet: ChIPseq_accession_numbers
TF	Species	ChIP replicate1	ChIP replicate2*	control*†
FOXA1	M. spretus	ERR392411	ERR392428	ERR392448,ERR392466
FOXA1	M. castaneus	ERR392437	ERR392438	ERR392434,ERR392455
FOXA1	R. rattus	ERR458089	ERR458090	ERR458085,ERR458087
FOXA1	M. musculus domesticus (AJ)	ERR392420	ERR392421	ERR392451,ERR392452
FOXA1	M. musculus domesticus (C57/BL6)	ERR392417	ERR392467	ERR392412,ERR392414,ERR392457,ERR392462
CEBPA	M. musculus domesticus (C57/BL6)	ERR392456	ERR392459	ERR392412,ERR392414,ERR392457,ERR392462
CEBPA	M. castaneus	ERR392430	ERR392450	ERR392434,ERR392455
CEBPA	R. rattus	ERR458086	ERR458088	ERR458085,ERR458087
CEBPA	M. spretus	ERR392426	ERR392429	ERR392448,ERR392466
CEBPA	H. sapien	do204_CEBPA_liver_sc9314_hsa1323_CRI02	do206_CEBPA_liver_sc9314_hsa1294_CRI02	do137_Input_liver_none_hsaHH1308_CRI01,do203_Input_liver_none_hsa1323_CRI01
CEBPA	M. musculus domesticus (AJ)	ERR392425	ERR392447	ERR392451,ERR392452
CEBPA	C. familiaris	do61_CEBPA_liver_sc91314C18_cfa4_CRI03_h0_t0	do79_CEBPA_liver_sc91314c18_cfa3_CRI01_h0_t0	do100_Input_liver_none_cfa4_CRI01,do107_Input_liver_none_cfa4_CRI01_h0_t0,do261_Input_liver_none_cfa3_CRI01
HNF4A	M. musculus domesticus (C57/BL6)	ERR392424	ERR392435	ERR392412,ERR392414,ERR392457,ERR392462
HNF4A	M. castaneus	ERR392416	ERR392465	ERR392434,ERR392455
HNF4A	R. rattus	ERR458091	ERR458092	ERR458085,ERR458087
HNF4A	M. musculus spretus	ERR392445	ERR392468	ERR392448,ERR392466
HNF4A	H. sapien	do199_HNF4a_liver_ARP31046_hsaHH1308_CRI02	do505_HNF4a_liver_ARP31046_hsaHH1294_CRI01	do137_Input_liver_none_hsaHH1308_CRI01,do203_Input_liver_none_hsa1323_CRI01
HNF4A	M. musculus domesticus (AJ)	ERR392423	ERR392433	ERR392451,ERR392452
HNF4A	C. familiaris	do75_HNF4a_liver_ARP31046_cfa3_SAN03	do76_HNF4a_liver_ARP31046_cfa4_SAN02	do100_Input_liver_none_cfa4_CRI01,do107_Input_liver_none_cfa4_CRI01_h0_t0,do261_Input_liver_none_cfa3_CRI01
GIANT	D. melanogaster	GSM511086_Dmel-GT	SRR976147	SRR976142,SRR976143
GIANT	D. yakuba	GSM511096_Dyak-GT	N/A	GSM511100_Dyak-Input250,GSM511099_Dyak-Input225
GIANT	D. pseudoobscura	SRR976155	N/A	SRR976153
TWIST	D. yakuba	ERR020084	ERR020085	ERR020086,ERR020087
TWIST	D. pseudoobscura	ERR020074	ERR020075	ERR020076,ERR020077
TWIST	D. melanogaster	ERR020068	ERR020069	ERR020070,ERR020071,ERR020072,ERR020073
TWIST	D. erecta	ERR020062	ERR020063	ERR020064,ERR020065
TWIST	D. ananassae	ERR020058	ERR020059	ERR020060,ERR020061
TWIST	D. simulans	ERR020080	ERR020081	ERR020082,ERR020083
CTCF	M. musculus domesticus (C57/BL6)	ERR022291	ERR022305	N/A
CTCF	R. rattus	ERR022308	ERR022309	N/A
CTCF	C. familiaris	ERR022286	ERR022304	N/A
CTCF	D. simulans	SRR066837	SRR066839	N/A
CTCF	H. sapien	ERR022295	ERR022303	N/A
CTCF	D. melanogaster	SRR066832	SRR066833	N./A
CTCF	D. pseudoobscura	SRR066847	SRR066848	N/A
CTCF	D. yakuba	SRR066843	SRR066844	N/A
*N/A if datasets do not exist or were not analyzed
†',' across multiple accession numbers indicates that these accession numbers were concatenated to form a single control for peak calling, otherwise controls were obtained from a single accession number
Figure 4 - source data 1: Accession numbers used in ChIP-seq analyses.
