# Supplementary material for: Evidence for a common evolutionary rate in metazoan transcriptional networks
Source: eLife. 2015 Dec 18;4:e11615. doi: 10.7554/eLife.11615 (PMC4764585; doi:10.7554/eLife.11615)
Supplement: Figure 4—source data 2. — DOI: http://dx.doi.org/10.7554/eLife.11615.014 [file elife-11615-fig4-data2.xlsx]

## Sheet: 648 segment-based ChIP analyses
Insect GSTF	Mammal GSTF	Distinct insect species analyzed (N)	Distinct mammal species analyzed (N)	Insect fit significant	Mammal fit significant	Anova significant	|Effect size @ 100 Myrs|	Divergences considered different	Peak caller	Quality filter	Sequence similarity filter	Overlap requirement	Reference subset
TWIST	CEBPA	6	7	0	1	0	0.474688	0	M	S	S	S	A
TWIST	CEBPA	6	7	1	1	1	1.72586	0	M	L	S	S	A
TWIST	CEBPA	6	7	1	1	1	3.06229	0	M	A	S	S	A
TWIST	CEBPA	6	7	0	1	0	40.4857	0	M	S	L	S	A
TWIST	CEBPA	6	7	1	1	0	1.21639	0	M	L	L	S	A
TWIST	CEBPA	6	7	1	1	1	16.3458	1	M	A	L	S	A
TWIST	CEBPA	6	7	0	1	0	40.292	0	M	S	N	S	A
TWIST	CEBPA	6	7	1	1	0	1.22301	0	M	L	N	S	A
TWIST	CEBPA	6	7	1	1	1	16.5481	1	M	A	N	S	A
TWIST	CEBPA	6	7	0	1	0	2.29398	0	M	S	S	L	A
TWIST	CEBPA	6	7	1	1	1	2.27249	0	M	L	S	L	A
TWIST	CEBPA	6	7	1	1	1	3.60515	0	M	A	S	L	A
TWIST	CEBPA	6	7	0	1	0	90.7375	0	M	S	L	L	A
TWIST	CEBPA	6	7	1	1	0	7.5034	0	M	L	L	L	A
TWIST	CEBPA	6	7	1	1	1	38.4274	1	M	A	L	L	A
TWIST	CEBPA	6	7	0	1	0	92.9582	0	M	S	N	L	A
TWIST	CEBPA	6	7	1	1	0	8.00587	0	M	L	N	L	A
TWIST	CEBPA	6	7	1	1	1	40.0053	1	M	A	N	L	A
TWIST	CEBPA	6	7	0	1	0	33.8853	0	M	S	S	S	P
TWIST	CEBPA	6	7	1	1	1	5.23326	1	M	L	S	S	P
TWIST	CEBPA	6	7	1	1	0	7.68832	0	M	A	S	S	P
TWIST	CEBPA	6	7	0	1	0	45.7015	0	M	S	L	S	P
TWIST	CEBPA	6	7	1	1	0	0.722925	0	M	L	L	S	P
TWIST	CEBPA	6	7	1	1	1	15.6655	1	M	A	L	S	P
TWIST	CEBPA	6	7	0	1	0	42.3771	0	M	S	N	S	P
TWIST	CEBPA	6	7	1	1	0	0.208614	0	M	L	N	S	P
TWIST	CEBPA	6	7	0	1	0	1.48112	0	S	S	S	S	A
TWIST	CEBPA	6	7	1	1	0	1.24703	0	S	L	S	S	A
TWIST	CEBPA	6	7	1	1	1	6.84694	1	S	A	S	S	A
TWIST	CEBPA	6	7	0	1	0	29.0629	0	S	S	L	S	A
TWIST	CEBPA	6	7	0	1	0	4.60963	0	S	L	L	S	A
TWIST	CEBPA	6	7	1	1	0	11.251	0	S	A	L	S	A
TWIST	CEBPA	6	7	0	1	0	28.6466	0	S	S	N	S	A
TWIST	CEBPA	6	7	0	1	0	4.5147	0	S	L	N	S	A
TWIST	CEBPA	6	7	1	1	0	10.9954	0	S	A	N	S	A
TWIST	CEBPA	6	7	0	1	0	0.900277	0	S	S	S	L	A
TWIST	CEBPA	6	7	1	1	0	1.84729	0	S	L	S	L	A
TWIST	CEBPA	6	7	1	1	1	7.92642	1	S	A	S	L	A
TWIST	CEBPA	6	7	0	1	0	46.0338	0	S	S	L	L	A
TWIST	CEBPA	6	7	0	1	0	8.19522	0	S	L	L	L	A
TWIST	CEBPA	6	7	1	1	1	22.3259	1	S	A	L	L	A
TWIST	CEBPA	6	7	0	1	0	47.6745	0	S	S	N	L	A
TWIST	CEBPA	6	7	0	1	0	8.56708	0	S	L	N	L	A
TWIST	CEBPA	6	7	0	1	1	23.9879	1	S	A	N	L	A
TWIST	CEBPA	6	7	0	1	0	31.0238	0	S	S	S	S	P
TWIST	CEBPA	6	7	1	1	0	4.66672	0	S	L	S	S	P
TWIST	CEBPA	6	7	1	1	0	3.95894	0	S	A	S	S	P
TWIST	CEBPA	6	7	0	1	0	32.4499	0	S	S	L	S	P
TWIST	CEBPA	6	7	0	1	0	2.35266	0	S	L	L	S	P
TWIST	CEBPA	6	7	1	1	0	8.65132	0	S	A	L	S	P
TWIST	CEBPA	6	7	0	1	0	28.9951	0	S	S	N	S	P
TWIST	CEBPA	6	7	0	1	0	3.01389	0	S	L	N	S	P
TWIST	CEBPA	6	7	1	1	0	7.80364	0	S	A	N	S	P
TWIST	CEBPA	6	7	0	1	0	43.9056	0	S	S	S	L	P
TWIST	CEBPA	6	7	0	1	0	6.87288	0	S	L	S	L	P
TWIST	CEBPA	6	7	1	1	0	9.15278	0	S	A	S	L	P
TWIST	CEBPA	6	7	0	1	0	52.4697	0	S	S	L	L	P
TWIST	CEBPA	6	7	0	1	0	4.53137	0	S	L	L	L	P
TWIST	CEBPA	6	7	0	1	0	20.6092	0	S	A	L	L	P
TWIST	CEBPA	6	7	0	1	0	49.2938	0	S	S	N	L	P
TWIST	CEBPA	6	7	0	1	0	5.95842	0	S	L	N	L	P
TWIST	CEBPA	6	7	0	1	0	20.6023	0	S	A	N	L	P
TWIST	CEBPA	6	7	0	1	0	14.4935	0	S	S	S	S	S
TWIST	CEBPA	6	7	0	1	1	7.53116	1	S	L	S	S	S
TWIST	CEBPA	6	7	0	1	1	7.77475	1	S	A	S	S	S
TWIST	CEBPA	6	7	0	1	0	30.9156	0	S	S	L	S	S
TWIST	CEBPA	6	7	0	1	0	2.12886	0	S	L	L	S	S
TWIST	CEBPA	6	7	1	1	0	7.52508	0	S	A	L	S	S
TWIST	CEBPA	6	7	0	1	0	28.0751	0	S	S	N	S	S
TWIST	CEBPA	6	7	0	1	0	2.76535	0	S	L	N	S	S
TWIST	CEBPA	6	7	1	1	0	6.66589	0	S	A	N	S	S
TWIST	CEBPA	6	7	0	1	0	23.0908	0	S	S	S	L	S
TWIST	CEBPA	6	7	0	1	1	10.3759	1	S	L	S	L	S
TWIST	CEBPA	6	7	0	1	0	6.1526	0	S	A	S	L	S
TWIST	CEBPA	6	7	0	1	0	50.431	0	S	S	L	L	S
TWIST	CEBPA	6	7	0	1	0	4.35397	0	S	L	L	L	S
TWIST	CEBPA	6	7	0	1	0	19.6523	0	S	A	L	L	S
TWIST	CEBPA	6	7	0	1	0	48.0292	0	S	S	N	L	S
TWIST	CEBPA	6	7	0	1	0	5.67864	0	S	L	N	L	S
TWIST	CEBPA	6	7	0	1	0	19.5125	0	S	A	N	L	S
TWIST	CEBPA	6	7	1	1	0	5.22739	0	M	L	N	L	S
TWIST	CEBPA	6	7	1	1	1	39.0559	1	M	A	N	L	S
TWIST	CEBPA	6	7	0	1	0	72.2964	0	M	S	S	L	P
TWIST	CEBPA	6	7	1	1	1	6.14612	1	M	L	S	L	P
TWIST	CEBPA	6	7	1	1	1	24.3632	1	M	A	S	L	P
TWIST	CEBPA	6	7	0	1	0	103.69	0	M	S	L	L	P
TWIST	CEBPA	6	7	1	1	0	4.73439	0	M	L	L	L	P
TWIST	CEBPA	6	7	1	1	1	39.6203	1	M	A	L	L	P
TWIST	CEBPA	6	7	0	1	0	98.6943	0	M	S	N	L	P
TWIST	CEBPA	6	7	1	1	0	5.78873	0	M	L	N	L	P
TWIST	CEBPA	6	7	1	1	1	39.3594	1	M	A	N	L	P
TWIST	CEBPA	6	7	0	1	0	30.6883	0	M	S	S	S	S
TWIST	CEBPA	6	7	0	1	1	7.61088	1	M	L	S	S	S
TWIST	CEBPA	6	7	1	1	0	3.67271	0	M	A	S	S	S
TWIST	CEBPA	6	7	1	1	1	15.4321	1	M	A	N	S	P
TWIST	CEBPA	6	7	1	1	0	1.21027	0	M	L	L	S	S
TWIST	CEBPA	6	7	1	1	1	15.7292	1	M	A	L	S	S
TWIST	CEBPA	6	7	0	1	0	42.3583	0	M	S	N	S	S
TWIST	CEBPA	6	7	1	1	0	0.568447	0	M	L	N	S	S
TWIST	CEBPA	6	7	1	1	1	15.1994	1	M	A	N	S	S
TWIST	CEBPA	6	7	0	1	0	79.1376	0	M	S	S	L	S
TWIST	CEBPA	6	7	1	1	1	10.2972	1	M	L	S	L	S
TWIST	CEBPA	6	7	1	1	0	7.33328	0	M	A	S	L	S
TWIST	CEBPA	6	7	0	1	0	102.176	0	M	S	L	L	S
TWIST	CEBPA	6	7	1	1	0	3.99035	0	M	L	L	L	S
TWIST	CEBPA	6	7	1	1	1	39.1556	1	M	A	L	L	S
TWIST	CEBPA	6	7	0	1	0	98.4769	0	M	S	N	L	S
TWIST	CEBPA	6	7	0	1	0	46.1382	0	M	S	L	S	S
GIANT	CEBPA	3	7	1	1	1	1.69788	0	M	S	S	S	A
GIANT	CEBPA	3	7	1	1	1	2.0165	0	M	L	S	S	A
GIANT	CEBPA	3	7	1	1	1	4.24461	0	M	A	S	S	A
GIANT	CEBPA	3	7	1	1	1	5.98337	1	M	S	L	S	A
GIANT	CEBPA	3	7	1	1	0	2.24893	0	M	L	L	S	A
GIANT	CEBPA	3	7	1	1	0	2.63088	0	M	A	L	S	A
GIANT	CEBPA	3	7	1	1	1	5.91321	1	M	S	N	S	A
GIANT	CEBPA	3	7	1	1	0	2.34654	0	M	L	N	S	A
GIANT	CEBPA	3	7	1	1	0	2.69877	0	M	A	N	S	A
GIANT	CEBPA	3	7	1	1	1	1.88347	0	M	S	S	L	A
GIANT	CEBPA	3	7	1	1	1	2.67994	0	M	L	S	L	A
GIANT	CEBPA	3	7	1	1	1	5.24974	1	M	A	S	L	A
GIANT	CEBPA	3	7	0	1	1	18.6279	1	M	S	L	L	A
GIANT	CEBPA	3	7	0	1	1	14.9948	1	M	L	L	L	A
GIANT	CEBPA	3	7	1	1	1	28.6554	1	M	A	L	L	A
GIANT	CEBPA	3	7	0	1	1	18.504	1	M	S	N	L	A
GIANT	CEBPA	3	7	0	1	1	15.4778	1	M	L	N	L	A
GIANT	CEBPA	3	7	1	1	1	29.4226	1	M	A	N	L	A
GIANT	CEBPA	3	7	1	1	0	0.435284	0	M	S	S	S	P
GIANT	CEBPA	3	7	1	1	0	3.03441	0	M	L	S	S	P
GIANT	CEBPA	3	7	1	1	1	8.3998	1	M	A	S	S	P
GIANT	CEBPA	3	7	1	1	0	5.63687	0	M	S	L	S	P
GIANT	CEBPA	3	7	1	1	0	0.963474	0	M	L	L	S	P
GIANT	CEBPA	3	7	1	1	0	0.187229	0	M	A	L	S	P
GIANT	CEBPA	3	7	1	1	0	5.56773	0	M	S	N	S	P
GIANT	CEBPA	3	7	1	1	0	1.29174	0	M	L	N	S	P
GIANT	CEBPA	3	7	1	1	1	4.51375	0	S	S	S	S	A
GIANT	CEBPA	3	7	1	1	1	2.10513	0	S	L	S	S	A
GIANT	CEBPA	3	7	1	1	1	8.98818	1	S	A	S	S	A
GIANT	CEBPA	3	7	1	1	1	3.99823	0	S	S	L	S	A
GIANT	CEBPA	3	7	1	1	0	0.782336	0	S	L	L	S	A
GIANT	CEBPA	3	7	1	1	1	10.7409	1	S	A	L	S	A
GIANT	CEBPA	3	7	1	1	0	3.73419	0	S	S	N	S	A
GIANT	CEBPA	3	7	1	1	0	0.553798	0	S	L	N	S	A
GIANT	CEBPA	3	7	1	1	1	10.407	1	S	A	N	S	A
GIANT	CEBPA	3	7	1	1	1	4.10034	0	S	S	S	L	A
GIANT	CEBPA	3	7	1	1	1	2.45927	0	S	L	S	L	A
GIANT	CEBPA	3	7	1	1	1	9.79527	1	S	A	S	L	A
GIANT	CEBPA	3	7	1	1	0	5.07102	0	S	S	L	L	A
GIANT	CEBPA	3	7	1	1	1	6.22801	1	S	L	L	L	A
GIANT	CEBPA	3	7	1	1	0	1.57879	0	S	A	L	L	A
GIANT	CEBPA	3	7	1	1	0	5.67265	0	S	S	N	L	A
GIANT	CEBPA	3	7	1	1	0	6.50142	0	S	L	N	L	A
GIANT	CEBPA	3	7	1	1	0	1.15813	0	S	A	N	L	A
GIANT	CEBPA	3	7	0	1	1	13.7958	1	S	S	S	S	P
GIANT	CEBPA	3	7	0	1	1	8.45666	1	S	L	S	S	P
GIANT	CEBPA	3	7	0	1	1	27.6637	1	S	A	S	S	P
GIANT	CEBPA	3	7	1	1	1	7.03557	1	S	S	L	S	P
GIANT	CEBPA	3	7	1	1	0	3.17654	0	S	L	L	S	P
GIANT	CEBPA	3	7	1	1	1	17.578	1	S	A	L	S	P
GIANT	CEBPA	3	7	1	1	1	5.94167	1	S	S	N	S	P
GIANT	CEBPA	3	7	1	1	0	2.1568	0	S	L	N	S	P
GIANT	CEBPA	3	7	1	1	1	15.2552	1	S	A	N	S	P
GIANT	CEBPA	3	7	1	1	0	1.48349	0	S	S	S	L	P
GIANT	CEBPA	3	7	1	1	0	2.10511	0	S	L	S	L	P
GIANT	CEBPA	3	7	1	1	1	12.1683	1	S	A	S	L	P
GIANT	CEBPA	3	7	1	1	0	3.69794	0	S	S	L	L	P
GIANT	CEBPA	3	7	1	1	0	4.03534	0	S	L	L	L	P
GIANT	CEBPA	3	7	1	1	0	7.69032	0	S	A	L	L	P
GIANT	CEBPA	3	7	1	1	0	4.10605	0	S	S	N	L	P
GIANT	CEBPA	3	7	1	1	0	4.45113	0	S	L	N	L	P
GIANT	CEBPA	3	7	1	1	0	6.30889	0	S	A	N	L	P
GIANT	CEBPA	3	7	0	1	1	16.6784	1	S	S	S	S	S
GIANT	CEBPA	3	7	0	1	1	9.94381	1	S	L	S	S	S
GIANT	CEBPA	3	7	0	1	1	32.6316	1	S	A	S	S	S
GIANT	CEBPA	3	7	1	1	1	8.11602	1	S	S	L	S	S
GIANT	CEBPA	3	7	1	1	0	3.71356	0	S	L	L	S	S
GIANT	CEBPA	3	7	1	1	1	19.4937	1	S	A	L	S	S
GIANT	CEBPA	3	7	1	1	1	6.7994	1	S	S	N	S	S
GIANT	CEBPA	3	7	1	1	0	2.64855	0	S	L	N	S	S
GIANT	CEBPA	3	7	1	1	1	16.865	1	S	A	N	S	S
GIANT	CEBPA	3	7	1	1	0	4.47286	0	S	S	S	L	S
GIANT	CEBPA	3	7	1	1	0	3.1086	0	S	L	S	L	S
GIANT	CEBPA	3	7	1	1	1	21.7048	1	S	A	S	L	S
GIANT	CEBPA	3	7	1	1	0	2.74452	0	S	S	L	L	S
GIANT	CEBPA	3	7	1	1	0	3.51983	0	S	L	L	L	S
GIANT	CEBPA	3	7	1	1	1	9.4342	1	S	A	L	L	S
GIANT	CEBPA	3	7	1	1	0	3.22725	0	S	S	N	L	S
GIANT	CEBPA	3	7	1	1	0	3.96231	0	S	L	N	L	S
GIANT	CEBPA	3	7	1	1	0	7.7935	0	S	A	N	L	S
GIANT	CEBPA	3	7	0	1	0	13.9754	0	M	L	N	L	S
GIANT	CEBPA	3	7	1	1	1	28.0177	1	M	A	N	L	S
GIANT	CEBPA	3	7	0	1	0	10.4481	0	M	S	S	L	P
GIANT	CEBPA	3	7	0	1	0	5.20915	0	M	L	S	L	P
GIANT	CEBPA	3	7	1	1	1	16.0669	1	M	A	S	L	P
GIANT	CEBPA	3	7	0	1	1	19.9893	1	M	S	L	L	P
GIANT	CEBPA	3	7	0	1	0	14.9901	0	M	L	L	L	P
GIANT	CEBPA	3	7	1	1	1	28.6593	1	M	A	L	L	P
GIANT	CEBPA	3	7	0	1	1	19.0372	1	M	S	N	L	P
GIANT	CEBPA	3	7	0	1	0	14.8291	0	M	L	N	L	P
GIANT	CEBPA	3	7	1	1	1	28.8912	1	M	A	N	L	P
GIANT	CEBPA	3	7	0	1	0	1.30016	0	M	S	S	S	S
GIANT	CEBPA	3	7	1	1	0	4.63729	0	M	L	S	S	S
GIANT	CEBPA	3	7	1	1	1	12.4528	1	M	A	S	S	S
GIANT	CEBPA	3	7	1	1	0	0.766174	0	M	A	N	S	P
GIANT	CEBPA	3	7	1	1	0	0.327979	0	M	L	L	S	S
GIANT	CEBPA	3	7	1	1	0	1.32063	0	M	A	L	S	S
GIANT	CEBPA	3	7	1	1	0	5.27869	0	M	S	N	S	S
GIANT	CEBPA	3	7	1	1	0	0.699465	0	M	L	N	S	S
GIANT	CEBPA	3	7	1	1	0	0.0837458	0	M	A	N	S	S
GIANT	CEBPA	3	7	0	1	0	8.65772	0	M	S	S	L	S
GIANT	CEBPA	3	7	0	1	0	1.74298	0	M	L	S	L	S
GIANT	CEBPA	3	7	1	1	0	3.92464	0	M	A	S	L	S
GIANT	CEBPA	3	7	0	1	1	19.378	1	M	S	L	L	S
GIANT	CEBPA	3	7	0	1	0	14.2774	0	M	L	L	L	S
GIANT	CEBPA	3	7	1	1	1	27.653	1	M	A	L	L	S
GIANT	CEBPA	3	7	0	1	1	18.5152	1	M	S	N	L	S
GIANT	CEBPA	3	7	1	1	0	5.26565	0	M	S	L	S	S
TWIST	FOXA1	6	6	0	1	0	2.38076	0	M	S	S	S	A
TWIST	FOXA1	6	6	1	1	0	0.584331	0	M	L	S	S	A
TWIST	FOXA1	6	6	1	1	1	1.31016	0	M	A	S	S	A
TWIST	FOXA1	6	6	0	1	0	44.0428	0	M	S	L	S	A
TWIST	FOXA1	6	6	1	1	0	5.12389	0	M	L	L	S	A
TWIST	FOXA1	6	6	1	1	1	24.382	1	M	A	L	S	A
TWIST	FOXA1	6	6	0	1	0	43.8834	0	M	S	N	S	A
TWIST	FOXA1	6	6	1	1	0	5.16735	0	M	L	N	S	A
TWIST	FOXA1	6	6	1	1	1	24.6992	1	M	A	N	S	A
TWIST	FOXA1	6	6	0	1	0	4.72776	0	M	S	S	L	A
TWIST	FOXA1	6	6	1	1	0	1.54306	0	M	L	S	L	A
TWIST	FOXA1	6	6	1	1	1	2.47931	0	M	A	S	L	A
TWIST	FOXA1	6	6	0	1	0	95.511	0	M	S	L	L	A
TWIST	FOXA1	6	6	1	1	0	14.1824	0	M	L	L	L	A
TWIST	FOXA1	6	6	1	1	1	49.7305	1	M	A	L	L	A
TWIST	FOXA1	6	6	0	1	0	97.8986	0	M	S	N	L	A
TWIST	FOXA1	6	6	1	1	0	14.9554	0	M	L	N	L	A
TWIST	FOXA1	6	6	1	1	1	51.7931	1	M	A	N	L	A
TWIST	FOXA1	6	6	0	1	0	40.9133	0	M	S	S	S	P
TWIST	FOXA1	6	6	1	1	0	2.36529	0	M	L	S	S	P
TWIST	FOXA1	6	6	1	1	1	23.2669	1	M	A	S	S	P
TWIST	FOXA1	6	6	0	1	0	51.2506	0	M	S	L	S	P
TWIST	FOXA1	6	6	1	1	0	5.7062	0	M	L	L	S	P
TWIST	FOXA1	6	6	1	1	1	28.2795	1	M	A	L	S	P
TWIST	FOXA1	6	6	0	1	0	47.2366	0	M	S	N	S	P
TWIST	FOXA1	6	6	1	1	0	5.47794	0	M	L	N	S	P
TWIST	FOXA1	6	6	1	1	1	26.5003	1	M	A	N	S	P
TWIST	FOXA1	6	6	0	1	0	81.2187	0	M	S	S	L	P
TWIST	FOXA1	6	6	1	1	0	6.17694	0	M	L	S	L	P
TWIST	FOXA1	6	6	1	1	1	44.8438	1	M	A	S	L	P
TWIST	FOXA1	6	6	0	1	0	111.146	0	M	S	L	L	P
TWIST	FOXA1	6	6	1	1	0	15.7682	0	M	L	L	L	P
TWIST	FOXA1	6	6	1	1	1	57.5653	1	M	A	L	L	P
TWIST	FOXA1	6	6	0	1	0	105.383	0	M	S	N	L	P
TWIST	FOXA1	6	6	1	1	0	15.8362	0	M	L	N	L	P
TWIST	FOXA1	6	6	1	1	1	55.4671	1	M	A	N	L	P
TWIST	FOXA1	6	6	0	1	0	38.8693	0	M	S	S	S	S
TWIST	FOXA1	6	6	0	1	0	1.25787	0	M	L	S	S	S
TWIST	FOXA1	6	6	1	1	0	13.2154	0	M	A	S	S	S
TWIST	FOXA1	6	6	0	1	0	52.082	0	M	S	L	S	S
TWIST	FOXA1	6	6	1	1	0	5.66423	0	M	L	L	S	S
TWIST	FOXA1	6	6	1	1	1	28.5175	1	M	A	L	S	S
TWIST	FOXA1	6	6	0	1	0	47.5632	0	M	S	N	S	S
TWIST	FOXA1	6	6	1	1	0	5.51888	0	M	L	N	S	S
TWIST	FOXA1	6	6	1	1	1	26.6321	1	M	A	N	S	S
TWIST	FOXA1	6	6	0	1	0	89.2252	0	M	S	S	L	S
TWIST	FOXA1	6	6	1	1	0	3.41106	0	M	L	S	L	S
TWIST	FOXA1	6	6	1	1	1	28.1384	1	M	A	S	L	S
TWIST	FOXA1	6	6	0	1	0	110.015	0	M	S	L	L	S
TWIST	FOXA1	6	6	1	1	0	15.3465	0	M	L	L	L	S
TWIST	FOXA1	6	6	1	1	1	56.1197	1	M	A	L	L	S
TWIST	FOXA1	6	6	0	1	0	105.555	0	M	S	N	L	S
TWIST	FOXA1	6	6	1	1	0	15.6763	0	M	L	N	L	S
TWIST	FOXA1	6	6	1	1	1	54.9008	1	M	A	N	L	S
TWIST	FOXA1	6	6	0	1	0	42.9811	0	S	S	L	S	S
TWIST	FOXA1	6	6	0	1	0	3.04212	0	S	S	S	S	A
TWIST	FOXA1	6	6	1	1	0	0.814726	0	S	L	S	S	A
TWIST	FOXA1	6	6	1	1	0	1.72841	0	S	A	S	S	A
TWIST	FOXA1	6	6	0	1	1	36.3082	1	S	S	L	S	A
TWIST	FOXA1	6	6	0	1	1	8.11937	1	S	L	L	S	A
TWIST	FOXA1	6	6	1	1	1	24.7581	1	S	A	L	S	A
TWIST	FOXA1	6	6	0	1	1	35.8909	1	S	S	N	S	A
TWIST	FOXA1	6	6	0	1	1	8.05744	1	S	L	N	S	A
TWIST	FOXA1	6	6	1	1	1	24.5227	1	S	A	N	S	A
TWIST	FOXA1	6	6	0	1	0	3.98864	0	S	S	S	L	A
TWIST	FOXA1	6	6	1	1	0	1.22948	0	S	L	S	L	A
TWIST	FOXA1	6	6	1	1	0	2.11777	0	S	A	S	L	A
TWIST	FOXA1	6	6	0	1	1	54.1455	1	S	S	L	L	A
TWIST	FOXA1	6	6	0	1	0	13.5774	0	S	L	L	L	A
TWIST	FOXA1	6	6	1	1	1	38.2796	1	S	A	L	L	A
TWIST	FOXA1	6	6	0	1	1	55.8805	1	S	S	N	L	A
TWIST	FOXA1	6	6	0	1	0	14.3723	0	S	L	N	L	A
TWIST	FOXA1	6	6	0	1	1	40.4435	1	S	A	N	L	A
TWIST	FOXA1	6	6	0	1	0	45.0408	0	S	S	S	S	P
TWIST	FOXA1	6	6	1	1	0	3.19827	0	S	L	S	S	P
TWIST	FOXA1	6	6	1	1	1	28.222	1	S	A	S	S	P
TWIST	FOXA1	6	6	0	1	1	43.4215	1	S	S	L	S	P
TWIST	FOXA1	6	6	0	1	1	8.79307	1	S	L	L	S	P
TWIST	FOXA1	6	6	1	1	1	29.3518	1	S	A	L	S	P
TWIST	FOXA1	6	6	0	1	1	38.7772	1	S	S	N	S	P
TWIST	FOXA1	6	6	0	1	1	8.39789	1	S	L	N	S	P
TWIST	FOXA1	6	6	1	1	1	26.2289	1	S	A	N	S	P
TWIST	FOXA1	6	6	0	1	1	59.0541	1	S	S	S	L	P
TWIST	FOXA1	6	6	0	1	0	4.22014	0	S	L	S	L	P
TWIST	FOXA1	6	6	1	1	1	36.1021	1	S	A	S	L	P
TWIST	FOXA1	6	6	0	1	1	64.7534	1	S	S	L	L	P
TWIST	FOXA1	6	6	0	1	0	14.4883	0	S	L	L	L	P
TWIST	FOXA1	6	6	0	1	1	45.2639	1	S	A	L	L	P
TWIST	FOXA1	6	6	0	1	1	60.3745	1	S	S	N	L	P
TWIST	FOXA1	6	6	0	1	0	14.8394	0	S	L	N	L	P
TWIST	FOXA1	6	6	0	1	1	43.15	1	S	A	N	L	P
TWIST	FOXA1	6	6	0	1	0	31.7516	0	S	S	S	S	S
TWIST	FOXA1	6	6	0	1	0	1.19921	0	S	L	S	S	S
TWIST	FOXA1	6	6	0	1	0	16.033	0	S	A	S	S	S
TWIST	FOXA1	6	6	0	1	0	14.7165	0	S	L	N	L	S
TWIST	FOXA1	6	6	0	1	0	8.758	0	S	L	L	S	S
TWIST	FOXA1	6	6	1	1	0	27.8755	0	S	A	L	S	S
TWIST	FOXA1	6	6	0	1	0	38.7086	0	S	S	N	S	S
TWIST	FOXA1	6	6	0	1	0	8.4443	0	S	L	N	S	S
TWIST	FOXA1	6	6	1	1	0	25.4199	0	S	A	N	S	S
TWIST	FOXA1	6	6	0	1	0	41.4738	0	S	S	S	L	S
TWIST	FOXA1	6	6	0	1	0	1.29221	0	S	L	S	L	S
TWIST	FOXA1	6	6	0	1	0	18.4851	0	S	A	S	L	S
TWIST	FOXA1	6	6	0	1	0	63.8182	0	S	S	L	L	S
TWIST	FOXA1	6	6	0	1	0	14.2111	0	S	L	L	L	S
TWIST	FOXA1	6	6	0	1	0	42.7623	0	S	A	L	L	S
TWIST	FOXA1	6	6	0	1	0	60.0129	0	S	S	N	L	S
TWIST	FOXA1	6	6	0	1	0	41.581	0	S	A	N	L	S
GIANT	FOXA1	3	6	1	1	0	0.208195	0	M	S	S	S	A
GIANT	FOXA1	3	6	1	1	0	0.293684	0	M	L	S	S	A
GIANT	FOXA1	3	6	1	1	0	0.127841	0	M	A	S	S	A
GIANT	FOXA1	3	6	1	1	1	9.54049	1	M	S	L	S	A
GIANT	FOXA1	3	6	1	1	0	6.15643	0	M	L	L	S	A
GIANT	FOXA1	3	6	1	1	1	10.6671	1	M	A	L	S	A
GIANT	FOXA1	3	6	1	1	1	9.50469	1	M	S	N	S	A
GIANT	FOXA1	3	6	1	1	0	6.29088	0	M	L	N	S	A
GIANT	FOXA1	3	6	1	1	1	10.8498	1	M	A	N	S	A
GIANT	FOXA1	3	6	1	1	1	0.550314	0	M	S	S	L	A
GIANT	FOXA1	3	6	1	1	0	1.13562	0	M	L	S	L	A
GIANT	FOXA1	3	6	1	1	1	0.834721	0	M	A	S	L	A
GIANT	FOXA1	3	6	0	1	1	23.4013	1	M	S	L	L	A
GIANT	FOXA1	3	6	0	1	1	21.6738	1	M	L	L	L	A
GIANT	FOXA1	3	6	1	1	1	39.9586	1	M	A	L	L	A
GIANT	FOXA1	3	6	0	1	1	23.4444	1	M	S	N	L	A
GIANT	FOXA1	3	6	0	1	1	22.4274	1	M	L	N	L	A
GIANT	FOXA1	3	6	1	1	1	41.2104	1	M	A	N	L	A
GIANT	FOXA1	3	6	1	1	1	7.4633	1	M	S	S	S	P
GIANT	FOXA1	3	6	1	1	0	4.56414	0	M	L	S	S	P
GIANT	FOXA1	3	6	1	1	1	7.17882	1	M	A	S	S	P
GIANT	FOXA1	3	6	1	1	1	11.1859	1	M	S	L	S	P
GIANT	FOXA1	3	6	1	1	0	7.3926	0	M	L	L	S	P
GIANT	FOXA1	3	6	1	1	1	12.4268	1	M	A	L	S	P
GIANT	FOXA1	3	6	1	1	1	10.4272	1	M	S	N	S	P
GIANT	FOXA1	3	6	1	1	0	6.97829	0	M	L	N	S	P
GIANT	FOXA1	3	6	1	1	1	11.8343	1	M	A	N	S	P
GIANT	FOXA1	3	6	0	1	1	19.3705	1	M	S	S	L	P
GIANT	FOXA1	3	6	0	1	0	17.5322	0	M	L	S	L	P
GIANT	FOXA1	3	6	1	1	1	36.5475	1	M	A	S	L	P
GIANT	FOXA1	3	6	0	1	1	27.4449	1	M	S	L	L	P
GIANT	FOXA1	3	6	0	1	0	26.024	0	M	L	L	L	P
GIANT	FOXA1	3	6	1	1	1	46.6043	1	M	A	L	L	P
GIANT	FOXA1	3	6	0	1	1	25.7262	1	M	S	N	L	P
GIANT	FOXA1	3	6	0	1	1	24.8766	1	M	L	N	L	P
GIANT	FOXA1	3	6	1	1	1	44.9988	1	M	A	N	L	P
GIANT	FOXA1	3	6	0	1	0	9.48119	0	M	S	S	S	S
GIANT	FOXA1	3	6	1	1	0	4.23146	0	M	L	S	S	S
GIANT	FOXA1	3	6	1	1	0	4.43526	0	M	A	S	S	S
GIANT	FOXA1	3	6	1	1	1	11.2095	1	M	S	L	S	S
GIANT	FOXA1	3	6	1	1	0	7.20249	0	M	L	L	S	S
GIANT	FOXA1	3	6	1	1	1	11.4677	1	M	A	L	S	S
GIANT	FOXA1	3	6	1	1	1	10.4836	1	M	S	N	S	S
GIANT	FOXA1	3	6	1	1	0	6.78679	0	M	L	N	S	S
GIANT	FOXA1	3	6	1	1	1	11.349	1	M	A	N	S	S
GIANT	FOXA1	3	6	0	1	0	18.7453	0	M	S	S	L	S
GIANT	FOXA1	3	6	0	1	0	15.4513	0	M	L	S	L	S
GIANT	FOXA1	3	6	1	1	1	24.7298	1	M	A	S	L	S
GIANT	FOXA1	3	6	0	1	1	27.2172	1	M	S	L	L	S
GIANT	FOXA1	3	6	0	1	0	25.6335	0	M	L	L	L	S
GIANT	FOXA1	3	6	1	1	1	44.6172	1	M	A	L	L	S
GIANT	FOXA1	3	6	0	1	1	25.5932	1	M	S	N	L	S
GIANT	FOXA1	3	6	0	1	0	24.4244	0	M	L	N	L	S
GIANT	FOXA1	3	6	1	1	1	43.8626	1	M	A	N	L	S
GIANT	FOXA1	3	6	1	1	1	3.94939	0	S	S	L	S	S
GIANT	FOXA1	3	6	1	1	0	0.00949717	0	S	S	S	S	A
GIANT	FOXA1	3	6	1	1	0	0.0433764	0	S	L	S	S	A
GIANT	FOXA1	3	6	1	1	0	0.412828	0	S	A	S	S	A
GIANT	FOXA1	3	6	1	1	1	3.24707	0	S	S	L	S	A
GIANT	FOXA1	3	6	1	1	1	2.72741	0	S	L	L	S	A
GIANT	FOXA1	3	6	1	1	0	2.76617	0	S	A	L	S	A
GIANT	FOXA1	3	6	1	1	1	3.51011	0	S	S	N	S	A
GIANT	FOXA1	3	6	1	1	1	2.98895	0	S	L	N	S	A
GIANT	FOXA1	3	6	1	1	0	3.12026	0	S	A	N	S	A
GIANT	FOXA1	3	6	1	1	1	0.788574	0	S	S	S	L	A
GIANT	FOXA1	3	6	1	1	1	0.6175	0	S	L	S	L	A
GIANT	FOXA1	3	6	1	1	0	0.248922	0	S	A	S	L	A
GIANT	FOXA1	3	6	1	1	1	13.1827	1	S	S	L	L	A
GIANT	FOXA1	3	6	1	1	1	11.6102	1	S	L	L	L	A
GIANT	FOXA1	3	6	1	1	0	14.3749	0	S	A	L	L	A
GIANT	FOXA1	3	6	1	1	1	13.8786	1	S	S	N	L	A
GIANT	FOXA1	3	6	1	1	1	12.3067	1	S	L	N	L	A
GIANT	FOXA1	3	6	1	1	0	15.2974	0	S	A	N	L	A
GIANT	FOXA1	3	6	0	1	0	0.221172	0	S	S	S	S	P
GIANT	FOXA1	3	6	0	1	0	0.591668	0	S	L	S	S	P
GIANT	FOXA1	3	6	0	1	0	3.40062	0	S	A	S	S	P
GIANT	FOXA1	3	6	1	1	1	3.93593	0	S	S	L	S	P
GIANT	FOXA1	3	6	1	1	1	3.26387	0	S	L	L	S	P
GIANT	FOXA1	3	6	1	1	0	3.1225	0	S	A	L	S	P
GIANT	FOXA1	3	6	1	1	1	3.84042	0	S	S	N	S	P
GIANT	FOXA1	3	6	1	1	1	3.22721	0	S	L	N	S	P
GIANT	FOXA1	3	6	1	1	0	3.17013	0	S	A	N	S	P
GIANT	FOXA1	3	6	1	1	1	16.632	1	S	S	S	L	P
GIANT	FOXA1	3	6	1	1	1	13.1981	1	S	L	S	L	P
GIANT	FOXA1	3	6	1	1	0	14.7811	0	S	A	S	L	P
GIANT	FOXA1	3	6	1	1	1	15.9816	1	S	S	L	L	P
GIANT	FOXA1	3	6	1	1	1	13.9923	1	S	L	L	L	P
GIANT	FOXA1	3	6	1	1	0	16.9644	0	S	A	L	L	P
GIANT	FOXA1	3	6	1	1	1	15.1867	1	S	S	N	L	P
GIANT	FOXA1	3	6	1	1	1	13.3321	1	S	L	N	L	P
GIANT	FOXA1	3	6	1	1	0	16.2388	0	S	A	N	L	P
GIANT	FOXA1	3	6	0	1	0	0.579577	0	S	S	S	S	S
GIANT	FOXA1	3	6	0	1	0	1.21343	0	S	L	S	S	S
GIANT	FOXA1	3	6	0	1	0	8.82382	0	S	A	S	S	S
GIANT	FOXA1	3	6	1	1	1	13.0001	1	S	L	N	L	S
GIANT	FOXA1	3	6	1	1	0	2.91558	0	S	L	L	S	S
GIANT	FOXA1	3	6	1	1	0	0.856758	0	S	A	L	S	S
GIANT	FOXA1	3	6	1	1	1	3.83413	0	S	S	N	S	S
GIANT	FOXA1	3	6	1	1	0	3.03039	0	S	L	N	S	S
GIANT	FOXA1	3	6	1	1	0	1.889	0	S	A	N	S	S
GIANT	FOXA1	3	6	1	1	1	13.9102	1	S	S	S	L	S
GIANT	FOXA1	3	6	1	1	0	8.55955	0	S	L	S	L	S
GIANT	FOXA1	3	6	1	1	0	2.93296	0	S	A	S	L	S
GIANT	FOXA1	3	6	1	1	1	16.1316	1	S	S	L	L	S
GIANT	FOXA1	3	6	1	1	1	13.3769	1	S	L	L	L	S
GIANT	FOXA1	3	6	1	1	0	13.6758	0	S	A	L	L	S
GIANT	FOXA1	3	6	1	1	1	15.2109	1	S	S	N	L	S
GIANT	FOXA1	3	6	1	1	0	14.275	0	S	A	N	L	S
GIANT	HNF4A	3	7	1	1	0	0.680867	0	M	S	S	S	A
GIANT	HNF4A	3	7	1	1	1	1.49404	0	M	L	S	S	A
GIANT	HNF4A	3	7	1	1	1	2.00282	0	M	A	S	S	A
GIANT	HNF4A	3	7	1	1	1	6.98613	1	M	S	L	S	A
GIANT	HNF4A	3	7	1	1	0	2.17928	0	M	L	L	S	A
GIANT	HNF4A	3	7	1	1	0	5.04978	0	M	A	L	S	A
GIANT	HNF4A	3	7	1	1	1	6.84603	1	M	S	N	S	A
GIANT	HNF4A	3	7	1	1	0	2.13423	0	M	L	N	S	A
GIANT	HNF4A	3	7	1	1	0	4.86125	0	M	A	N	S	A
GIANT	HNF4A	3	7	1	1	0	0.877	0	M	S	S	L	A
GIANT	HNF4A	3	7	1	1	1	2.93321	0	M	L	S	L	A
GIANT	HNF4A	3	7	1	1	1	4.00129	0	M	A	S	L	A
GIANT	HNF4A	3	7	0	1	1	18.7639	1	M	S	L	L	A
GIANT	HNF4A	3	7	0	1	0	11.9147	0	M	L	L	L	A
GIANT	HNF4A	3	7	1	1	1	26.3426	1	M	A	L	L	A
GIANT	HNF4A	3	7	0	1	1	18.3815	1	M	S	N	L	A
GIANT	HNF4A	3	7	0	1	0	11.8644	0	M	L	N	L	A
GIANT	HNF4A	3	7	1	1	1	26.208	1	M	A	N	L	A
GIANT	HNF4A	3	7	1	1	0	2.97426	0	M	S	S	S	P
GIANT	HNF4A	3	7	1	1	0	2.67122	0	M	L	S	S	P
GIANT	HNF4A	3	7	1	1	0	3.15983	0	M	A	S	S	P
GIANT	HNF4A	3	7	1	1	0	6.94395	0	M	S	L	S	P
GIANT	HNF4A	3	7	1	1	0	0.534884	0	M	L	L	S	P
GIANT	HNF4A	3	7	1	1	0	2.98336	0	M	A	L	S	P
GIANT	HNF4A	3	7	1	1	0	6.85965	0	M	S	N	S	P
GIANT	HNF4A	3	7	1	1	0	1.00188	0	M	L	N	S	P
GIANT	HNF4A	3	7	1	1	0	3.76339	0	M	A	N	S	P
GIANT	HNF4A	3	7	0	1	0	12.1755	0	M	S	S	L	P
GIANT	HNF4A	3	7	0	1	0	1.18102	0	M	L	S	L	P
GIANT	HNF4A	3	7	1	1	0	13.4732	0	M	A	S	L	P
GIANT	HNF4A	3	7	0	1	1	19.7416	1	M	S	L	L	P
GIANT	HNF4A	3	7	0	1	0	9.16002	0	M	L	L	L	P
GIANT	HNF4A	3	7	1	1	1	23.5876	1	M	A	L	L	P
GIANT	HNF4A	3	7	0	1	1	18.9325	1	M	S	N	L	P
GIANT	HNF4A	3	7	0	1	0	9.67311	0	M	L	N	L	P
GIANT	HNF4A	3	7	1	1	1	24.7443	1	M	A	N	L	P
GIANT	HNF4A	3	7	0	1	0	5.02578	0	M	S	S	S	S
GIANT	HNF4A	3	7	1	1	0	3.69683	0	M	L	S	S	S
GIANT	HNF4A	3	7	1	1	0	5.27864	0	M	A	S	S	S
GIANT	HNF4A	3	7	1	1	0	6.75477	0	M	S	L	S	S
GIANT	HNF4A	3	7	1	1	0	0.0480777	0	M	L	L	S	S
GIANT	HNF4A	3	7	1	1	0	2.32301	0	M	A	L	S	S
GIANT	HNF4A	3	7	1	1	0	6.73523	0	M	S	N	S	S
GIANT	HNF4A	3	7	1	1	0	0.511961	0	M	L	N	S	S
GIANT	HNF4A	3	7	1	1	0	3.30721	0	M	A	N	S	S
GIANT	HNF4A	3	7	0	1	0	11.9657	0	M	S	S	L	S
GIANT	HNF4A	3	7	0	1	0	1.06238	0	M	L	S	L	S
GIANT	HNF4A	3	7	1	1	0	3.95876	0	M	A	S	L	S
GIANT	HNF4A	3	7	0	1	1	19.2704	1	M	S	L	L	S
GIANT	HNF4A	3	7	0	1	0	8.50945	0	M	L	L	L	S
GIANT	HNF4A	3	7	1	1	1	22.7841	1	M	A	L	L	S
GIANT	HNF4A	3	7	0	1	1	18.5119	1	M	S	N	L	S
GIANT	HNF4A	3	7	0	1	0	8.62274	0	M	L	N	L	S
GIANT	HNF4A	3	7	1	1	1	23.7413	1	M	A	N	L	S
GIANT	HNF4A	3	7	1	1	1	14.1955	1	S	A	N	S	P
GIANT	HNF4A	3	7	1	1	0	2.6038	0	S	S	S	L	P
GIANT	HNF4A	3	7	1	1	0	2.45927	0	S	L	S	L	P
GIANT	HNF4A	3	7	1	1	1	15.0633	1	S	A	S	L	P
GIANT	HNF4A	3	7	1	1	0	4.11321	0	S	S	L	L	P
GIANT	HNF4A	3	7	1	1	0	0.13845	0	S	L	L	L	P
GIANT	HNF4A	3	7	1	1	0	10.2306	0	S	A	L	L	P
GIANT	HNF4A	3	7	1	1	0	4.77382	0	S	S	N	L	P
GIANT	HNF4A	3	7	1	1	0	1.19635	0	S	L	N	L	P
GIANT	HNF4A	3	7	1	1	0	7.96518	0	S	A	N	L	P
GIANT	HNF4A	3	7	0	1	1	13.372	1	S	S	S	S	S
GIANT	HNF4A	3	7	0	1	1	11.7316	1	S	L	S	S	S
GIANT	HNF4A	3	7	0	1	1	31.259	1	S	A	S	S	S
GIANT	HNF4A	3	7	1	1	1	6.46187	1	S	S	L	S	S
GIANT	HNF4A	3	7	1	1	0	5.66015	0	S	L	L	S	S
GIANT	HNF4A	3	7	1	1	1	18.6356	1	S	A	L	S	S
GIANT	HNF4A	3	7	1	1	0	4.99165	0	S	S	N	S	S
GIANT	HNF4A	3	7	1	1	0	4.03097	0	S	L	N	S	S
GIANT	HNF4A	3	7	1	1	1	15.4152	1	S	A	N	S	S
GIANT	HNF4A	3	7	1	1	0	2.04349	0	S	S	S	L	S
GIANT	HNF4A	3	7	1	1	0	7.22876	0	S	L	S	L	S
GIANT	HNF4A	3	7	1	1	1	23.4194	1	S	A	S	L	S
GIANT	HNF4A	3	7	1	1	0	3.36321	0	S	S	L	L	S
GIANT	HNF4A	3	7	1	1	0	0.617061	0	S	L	L	L	S
GIANT	HNF4A	3	7	1	1	1	11.5121	1	S	A	L	L	S
GIANT	HNF4A	3	7	1	1	0	4.08362	0	S	S	N	L	S
GIANT	HNF4A	3	7	1	1	0	0.611155	0	S	L	N	L	S
GIANT	HNF4A	3	7	1	1	1	9.17525	1	S	A	N	L	S
GIANT	HNF4A	3	7	1	1	0	3.50629	0	S	L	N	S	P
GIANT	HNF4A	3	7	1	1	1	2.94141	0	S	S	S	S	A
GIANT	HNF4A	3	7	1	1	1	2.11188	0	S	L	S	S	A
GIANT	HNF4A	3	7	1	1	1	6.84386	1	S	A	S	S	A
GIANT	HNF4A	3	7	1	1	0	2.67199	0	S	S	L	S	A
GIANT	HNF4A	3	7	1	1	0	1.59451	0	S	L	L	S	A
GIANT	HNF4A	3	7	1	1	1	9.57087	1	S	A	L	S	A
GIANT	HNF4A	3	7	1	1	0	2.45889	0	S	S	N	S	A
GIANT	HNF4A	3	7	1	1	0	1.44285	0	S	L	N	S	A
GIANT	HNF4A	3	7	1	1	1	9.40882	1	S	A	N	S	A
GIANT	HNF4A	3	7	1	1	1	2.7228	0	S	S	S	L	A
GIANT	HNF4A	3	7	1	1	1	2.75511	0	S	L	S	L	A
GIANT	HNF4A	3	7	1	1	1	8.09437	1	S	A	S	L	A
GIANT	HNF4A	3	7	1	1	0	5.83633	0	S	S	L	L	A
GIANT	HNF4A	3	7	1	1	0	4.41599	0	S	L	L	L	A
GIANT	HNF4A	3	7	1	1	0	1.95329	0	S	A	L	L	A
GIANT	HNF4A	3	7	1	1	0	6.2822	0	S	S	N	L	A
GIANT	HNF4A	3	7	1	1	0	4.35493	0	S	L	N	L	A
GIANT	HNF4A	3	7	1	1	0	2.07299	0	S	A	N	L	A
GIANT	HNF4A	3	7	0	1	1	11.5683	1	S	S	S	S	P
GIANT	HNF4A	3	7	0	1	1	10.5128	1	S	L	S	S	P
GIANT	HNF4A	3	7	0	1	1	27.1631	1	S	A	S	S	P
GIANT	HNF4A	3	7	1	1	0	5.62645	0	S	S	L	S	P
GIANT	HNF4A	3	7	1	1	0	5.15402	0	S	L	L	S	P
GIANT	HNF4A	3	7	1	1	1	17.2144	1	S	A	L	S	P
GIANT	HNF4A	3	7	1	1	0	4.34172	0	S	S	N	S	P
TWIST	HNF4A	6	7	0	1	0	0.0912166	0	S	S	S	S	A
TWIST	HNF4A	6	7	1	1	0	1.25378	0	S	L	S	S	A
TWIST	HNF4A	6	7	1	1	1	4.70262	0	S	A	S	S	A
TWIST	HNF4A	6	7	0	1	0	30.3892	0	S	S	L	S	A
TWIST	HNF4A	6	7	0	1	0	3.79745	0	S	L	L	S	A
TWIST	HNF4A	6	7	1	1	0	12.4211	0	S	A	L	S	A
TWIST	HNF4A	6	7	0	1	0	29.9219	0	S	S	N	S	A
TWIST	HNF4A	6	7	0	1	0	3.62564	0	S	L	N	S	A
TWIST	HNF4A	6	7	1	1	0	11.9936	0	S	A	N	S	A
TWIST	HNF4A	6	7	0	1	0	0.477259	0	S	S	S	L	A
TWIST	HNF4A	6	7	1	1	1	2.14312	0	S	L	S	L	A
TWIST	HNF4A	6	7	1	1	1	6.22552	1	S	A	S	L	A
TWIST	HNF4A	6	7	0	1	0	46.7991	0	S	S	L	L	A
TWIST	HNF4A	6	7	0	1	0	6.3832	0	S	L	L	L	A
TWIST	HNF4A	6	7	1	1	1	21.9514	1	S	A	L	L	A
TWIST	HNF4A	6	7	0	1	0	48.2841	0	S	S	N	L	A
TWIST	HNF4A	6	7	0	1	0	6.42059	0	S	L	N	L	A
TWIST	HNF4A	6	7	0	1	1	23.0731	1	S	A	N	L	A
TWIST	HNF4A	6	7	0	1	0	33.2513	0	S	S	S	S	P
TWIST	HNF4A	6	7	1	1	1	6.72288	1	S	L	S	S	P
TWIST	HNF4A	6	7	1	1	0	4.45957	0	S	A	S	S	P
TWIST	HNF4A	6	7	0	1	0	33.8591	0	S	S	L	S	P
TWIST	HNF4A	6	7	0	1	0	0.375184	0	S	L	L	S	P
TWIST	HNF4A	6	7	1	1	0	9.0149	0	S	A	L	S	P
TWIST	HNF4A	6	7	0	1	0	30.5951	0	S	S	N	S	P
TWIST	HNF4A	6	7	0	1	0	1.6644	0	S	L	N	S	P
TWIST	HNF4A	6	7	0	1	0	1.4917	0	M	S	S	S	A
TWIST	HNF4A	6	7	1	1	1	1.2034	0	M	L	S	S	A
TWIST	HNF4A	6	7	1	1	0	0.820502	0	M	A	S	S	A
TWIST	HNF4A	6	7	0	1	0	41.4884	0	M	S	L	S	A
TWIST	HNF4A	6	7	1	1	0	1.14674	0	M	L	L	S	A
TWIST	HNF4A	6	7	1	1	1	18.7647	1	M	A	L	S	A
TWIST	HNF4A	6	7	0	1	0	41.2248	0	M	S	N	S	A
TWIST	HNF4A	6	7	1	1	0	1.0107	0	M	L	N	S	A
TWIST	HNF4A	6	7	1	1	1	18.7106	1	M	A	N	S	A
TWIST	HNF4A	6	7	0	1	0	3.30045	0	M	S	S	L	A
TWIST	HNF4A	6	7	1	1	1	2.52576	0	M	L	S	L	A
TWIST	HNF4A	6	7	1	1	0	2.3567	0	M	A	S	L	A
TWIST	HNF4A	6	7	0	1	1	90.8735	1	M	S	L	L	A
TWIST	HNF4A	6	7	1	1	0	4.42327	0	M	L	L	L	A
TWIST	HNF4A	6	7	1	1	1	36.1145	1	M	A	L	L	A
TWIST	HNF4A	6	7	0	1	1	92.8357	1	M	S	N	L	A
TWIST	HNF4A	6	7	1	1	0	4.39244	0	M	L	N	L	A
TWIST	HNF4A	6	7	1	1	1	36.7907	1	M	A	N	L	A
TWIST	HNF4A	6	7	0	1	0	36.4243	0	M	S	S	S	P
TWIST	HNF4A	6	7	1	1	1	4.87007	0	M	L	S	S	P
TWIST	HNF4A	6	7	1	1	0	12.9283	0	M	A	S	S	P
TWIST	HNF4A	6	7	0	1	0	47.0086	0	M	S	L	S	P
TWIST	HNF4A	6	7	1	1	0	1.15152	0	M	L	L	S	P
TWIST	HNF4A	6	7	1	1	1	18.8361	1	M	A	L	S	P
TWIST	HNF4A	6	7	0	1	0	43.669	0	M	S	N	S	P
TWIST	HNF4A	6	7	1	1	0	0.498468	0	M	L	N	S	P
TWIST	HNF4A	6	7	1	1	1	18.4293	1	M	A	N	S	P
TWIST	HNF4A	6	7	0	1	0	74.0237	0	M	S	S	L	P
TWIST	HNF4A	6	7	1	1	1	10.1742	1	M	L	S	L	P
TWIST	HNF4A	6	7	1	1	1	21.7695	1	M	A	S	L	P
TWIST	HNF4A	6	7	0	1	0	103.442	0	M	S	L	L	P
TWIST	HNF4A	6	7	1	1	0	1.09571	0	M	L	L	L	P
TWIST	HNF4A	6	7	1	1	1	34.5486	1	M	A	L	L	P
TWIST	HNF4A	6	7	0	1	0	98.5895	0	M	S	N	L	P
TWIST	HNF4A	6	7	1	1	0	0.632694	0	M	L	N	L	P
TWIST	HNF4A	6	7	1	1	1	35.2125	1	M	A	N	L	P
TWIST	HNF4A	6	7	0	1	0	34.4139	0	M	S	S	S	S
TWIST	HNF4A	6	7	0	1	1	6.67042	1	M	L	S	S	S
TWIST	HNF4A	6	7	1	1	0	3.50149	0	M	A	S	S	S
TWIST	HNF4A	6	7	0	1	0	47.6273	0	M	S	L	S	S
TWIST	HNF4A	6	7	1	1	0	1.49017	0	M	L	L	S	S
TWIST	HNF4A	6	7	1	1	1	19.3728	1	M	A	L	S	S
TWIST	HNF4A	6	7	0	1	0	43.8148	0	M	S	N	S	S
TWIST	HNF4A	6	7	1	1	0	0.755951	0	M	L	N	S	S
TWIST	HNF4A	6	7	1	1	1	18.5904	1	M	A	N	S	S
TWIST	HNF4A	6	7	0	1	0	82.4456	0	M	S	S	L	S
TWIST	HNF4A	6	7	1	1	1	13.1026	1	M	L	S	L	S
TWIST	HNF4A	6	7	1	1	0	7.36741	0	M	A	S	L	S
TWIST	HNF4A	6	7	0	1	0	102.068	0	M	S	L	L	S
TWIST	HNF4A	6	7	1	1	0	1.77755	0	M	L	L	L	S
TWIST	HNF4A	6	7	1	1	1	34.2866	1	M	A	L	L	S
TWIST	HNF4A	6	7	0	1	0	98.4736	0	M	S	N	L	S
TWIST	HNF4A	6	7	1	1	0	0.125322	0	M	L	N	L	S
TWIST	HNF4A	6	7	1	1	1	34.7795	1	M	A	N	L	S
TWIST	HNF4A	6	7	0	1	0	2.32749	0	S	L	N	L	S
TWIST	HNF4A	6	7	0	1	0	18.1307	0	S	A	N	L	S
TWIST	HNF4A	6	7	0	1	0	45.0259	0	S	S	S	L	P
TWIST	HNF4A	6	7	0	1	1	11.4373	1	S	L	S	L	P
TWIST	HNF4A	6	7	1	1	0	6.25777	0	S	A	S	L	P
TWIST	HNF4A	6	7	0	1	0	52.885	0	S	S	L	L	P
TWIST	HNF4A	6	7	0	1	0	0.357582	0	S	L	L	L	P
TWIST	HNF4A	6	7	0	1	0	18.0689	0	S	A	L	L	P
TWIST	HNF4A	6	7	0	1	0	49.9615	0	S	S	N	L	P
TWIST	HNF4A	6	7	0	1	0	2.70364	0	S	L	N	L	P
TWIST	HNF4A	6	7	0	1	0	18.946	0	S	A	N	L	P
TWIST	HNF4A	6	7	0	1	0	17.8	0	S	S	S	S	S
TWIST	HNF4A	6	7	0	1	1	9.31895	1	S	L	S	S	S
TWIST	HNF4A	6	7	0	1	0	6.40215	0	S	A	S	S	S
TWIST	HNF4A	6	7	1	1	0	8.86333	0	S	A	N	S	P
TWIST	HNF4A	6	7	0	1	0	0.182266	0	S	L	L	S	S
TWIST	HNF4A	6	7	1	1	0	8.38315	0	S	A	L	S	S
TWIST	HNF4A	6	7	0	1	0	29.8828	0	S	S	N	S	S
TWIST	HNF4A	6	7	0	1	0	1.38293	0	S	L	N	S	S
TWIST	HNF4A	6	7	1	1	0	8.11567	0	S	A	N	S	S
TWIST	HNF4A	6	7	0	1	0	25.5201	0	S	S	S	L	S
TWIST	HNF4A	6	7	0	1	1	14.4961	1	S	L	S	L	S
TWIST	HNF4A	6	7	0	1	0	7.86725	0	S	A	S	L	S
TWIST	HNF4A	6	7	0	1	0	51.0497	0	S	S	L	L	S
TWIST	HNF4A	6	7	0	1	0	0.217085	0	S	L	L	L	S
TWIST	HNF4A	6	7	0	1	0	17.5744	0	S	A	L	L	S
TWIST	HNF4A	6	7	0	1	0	48.8855	0	S	S	N	L	S
TWIST	HNF4A	6	7	0	1	0	32.5698	0	S	S	L	S	S
Figure 4 - source data 2: 648 segment-based ChIP analyses
