# Supplementary material for: Химия соединений, закреплённых на минеральных носителях
Source: eLife journal article supplement (doi:10.7554/elife.11615), 1985-01-01
Supplement: supp [file elife-11615-supp-v1.zip]

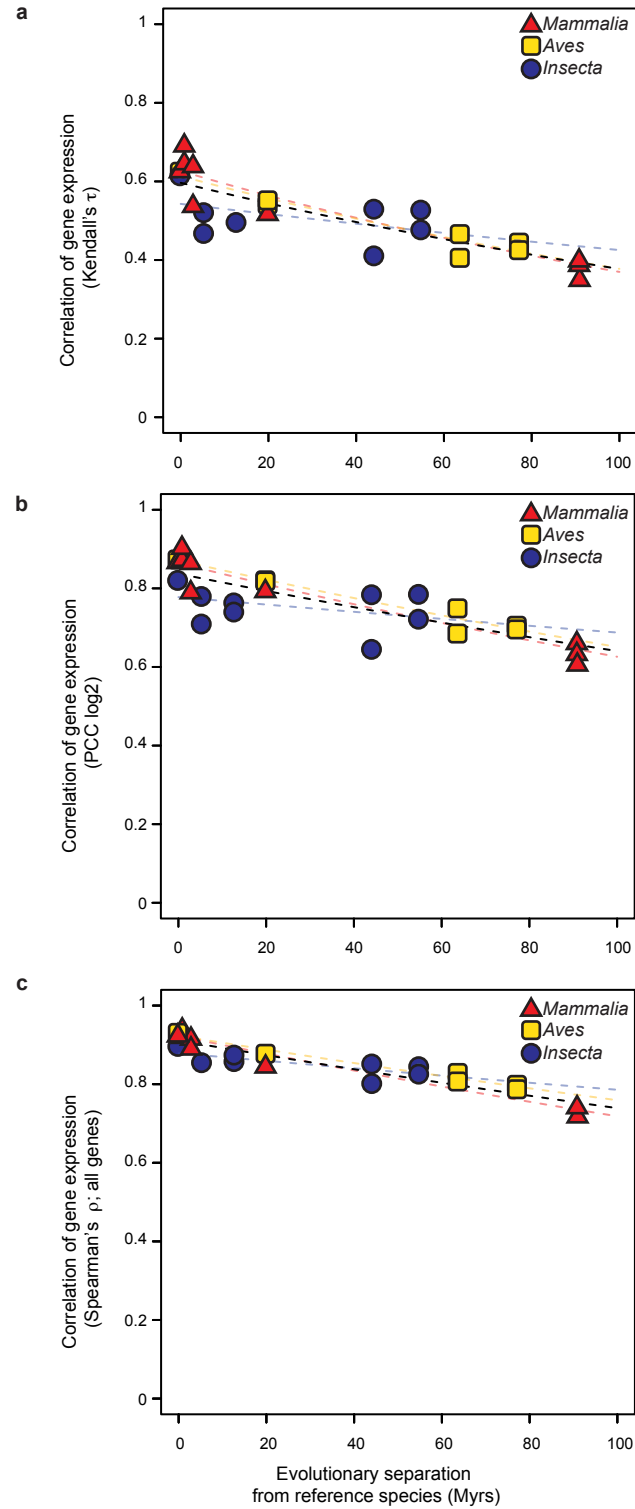

**Figure 3 - figure supplement 1 | The common evolutionary rate of gene expression levels presented in Fig. 3 is robust to changes in correlation metrics or expression threshold. a,b,** The gene expression levels used in Fig. 3 were correlated with alternative correlation metrics, Kendalls  $\tau$  (a) and Pearson's R (b). The resulting evolutionary rates remained statistically indistinguishable. **c,** The gene expression level of all genes were analyzed rather than excluding the values below 5 TPM as was done in Fig. 3. The resulting evolutionary rates remained statistically indistinguishable.
