# Supplementary material for: Химия соединений, закреплённых на минеральных носителях
Source: eLife journal article supplement (doi:10.7554/elife.11615), 1985-01-01
Supplement: supp [file elife-11615-supp-v1.zip]

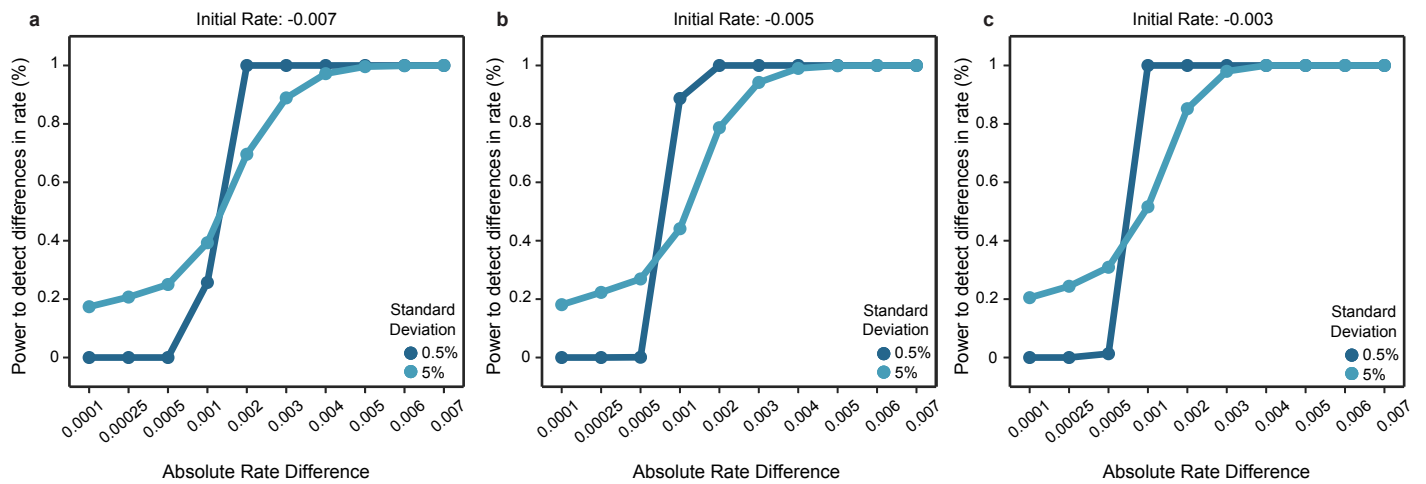

**Figure 1 - figure supplement 2 | Power of the statistical framework to evaluate differences in evolutionary rates.**  
**a,b,c,** Depict the sensitivity of our statistical framework to detect differences in 1000 simulations. The initial rates of one clade was fixed to either -0.007 (**a**), -0.005 (**b**) or -0.003 (**c**) and data was simulated by modeling an exponential decay where samples were drawn from a Gaussian distribution with standard deviation fixed to 0.5% and 5%. The second clade's rate was modeled according to the absolute difference in rates with steps shown in the x axis and sampled similarly as the first clade. Simulated data was used as input to our statistical framework and the frequency of detecting a significant difference is shown.
