# Supplementary material for: Химия соединений, закреплённых на минеральных носителях
Source: eLife journal article supplement (doi:10.7554/elife.11615), 1985-01-01
Supplement: supp [file elife-11615-supp-v1.zip]

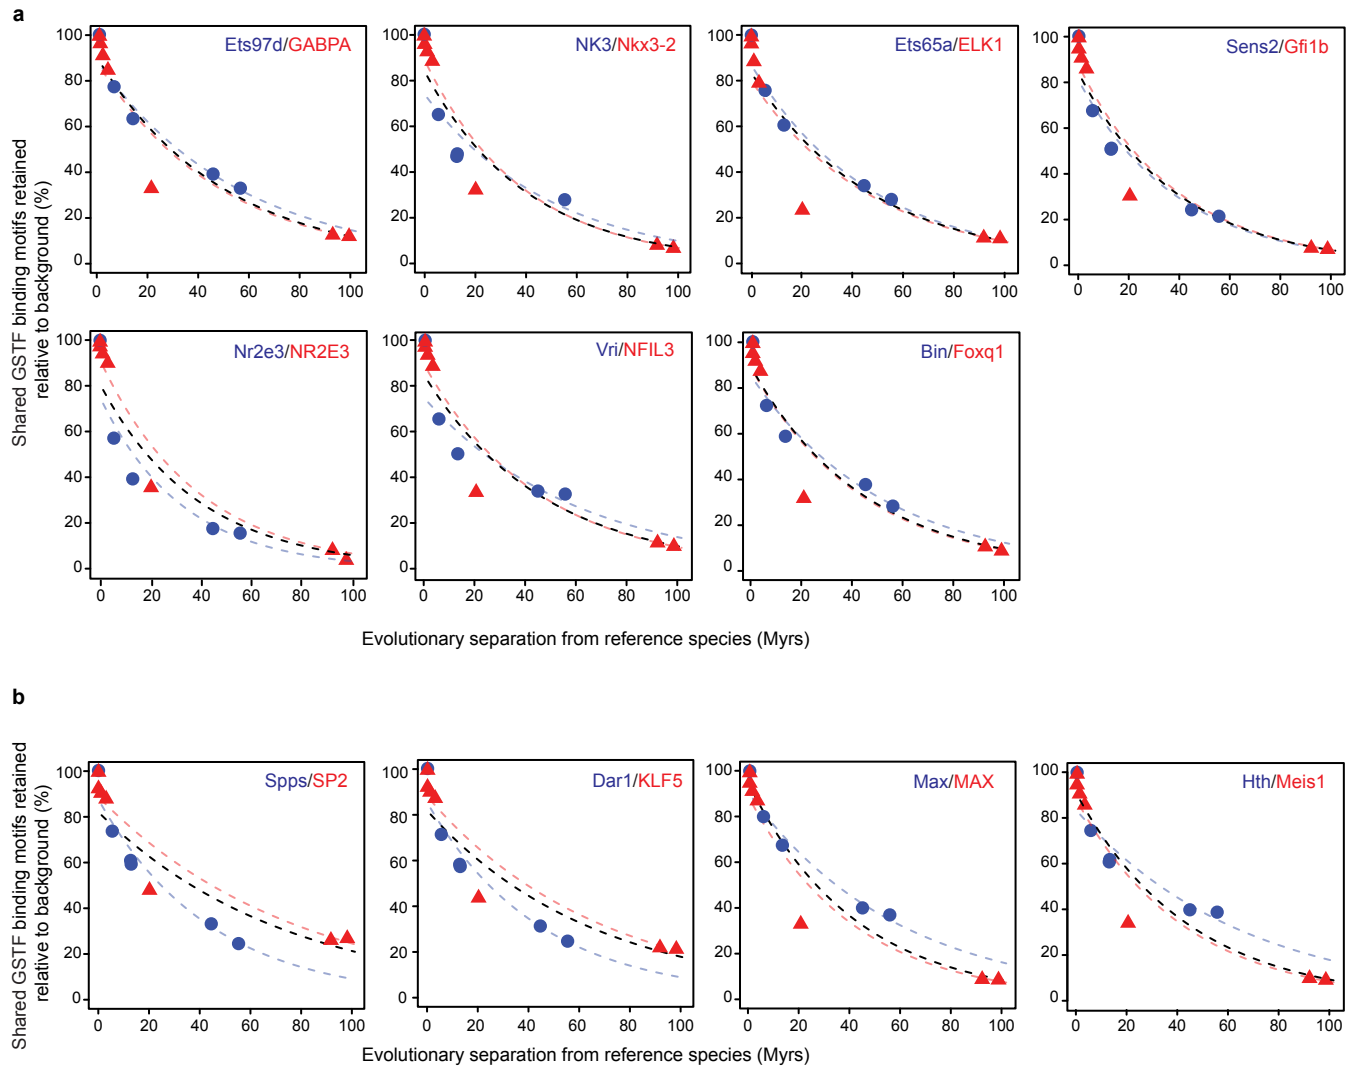

**Figure 5 - figure supplement 1 | Conservation of *cis*-regulatory motifs for GSTFs conserved across insects and mammals. a,** Seven shared GSTFs whose motifs are retained at indistinguishable rates in mammals and insects.

The evolution of these motifs behave similarly to that of the example shown in **Fig. 5. b**, Four conserved GSTFs whose motifs are retained at different rates in mammals and insects.
