# Supplementary material for: Химия соединений, закреплённых на минеральных носителях
Source: eLife journal article supplement (doi:10.7554/elife.11615), 1985-01-01
Supplement: supp [file elife-11615-supp-v1.zip]

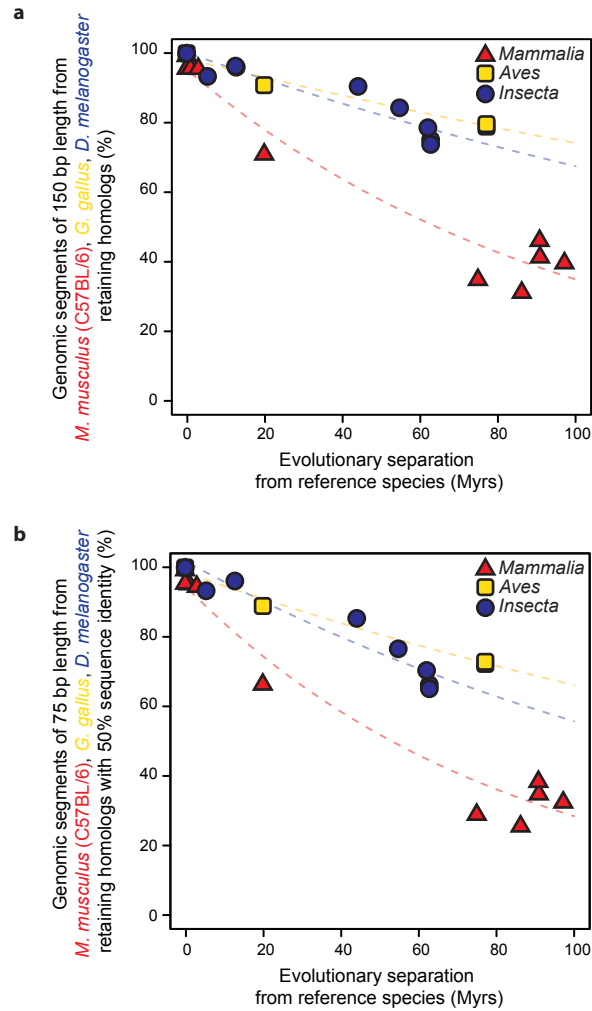

**Figure 2 - figure supplement 2 | Retention of genomic segments is robust to changes in sampled region size and sequence identity threshold. a,** Following the same procedure as in Fig. 2 but varying the segment length to 150 bp and **b,** increasing the LiftOver minMatch parameter to 0.5.
