# Supplementary material for: Химия соединений, закреплённых на минеральных носителях
Source: eLife journal article supplement (doi:10.7554/elife.11615), 1985-01-01
Supplement: supp [file elife-11615-supp-v1.zip]

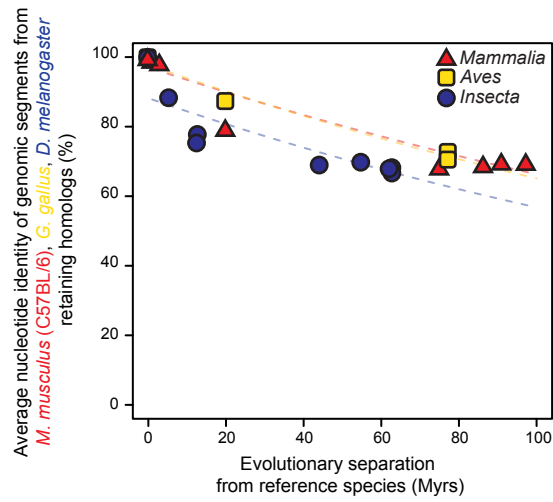

**Figure 2 - figure supplement 1 | Genomic segments retaining homologs are highly conserved at the nucleotide level.** The genomic segments found to retain homologs in Fig. 2 were aligned to their homologous regions. The average nucleotide identity of the corresponding ungapped alignment is shown here. Evolutionary rates are slightly but significantly different among lineages ( $P < 0.05$ ).
