# Supplementary material for: Химия соединений, закреплённых на минеральных носителях
Source: eLife journal article supplement (doi:10.7554/elife.11615), 1985-01-01
Supplement: supp [file elife-11615-supp-v1.zip]

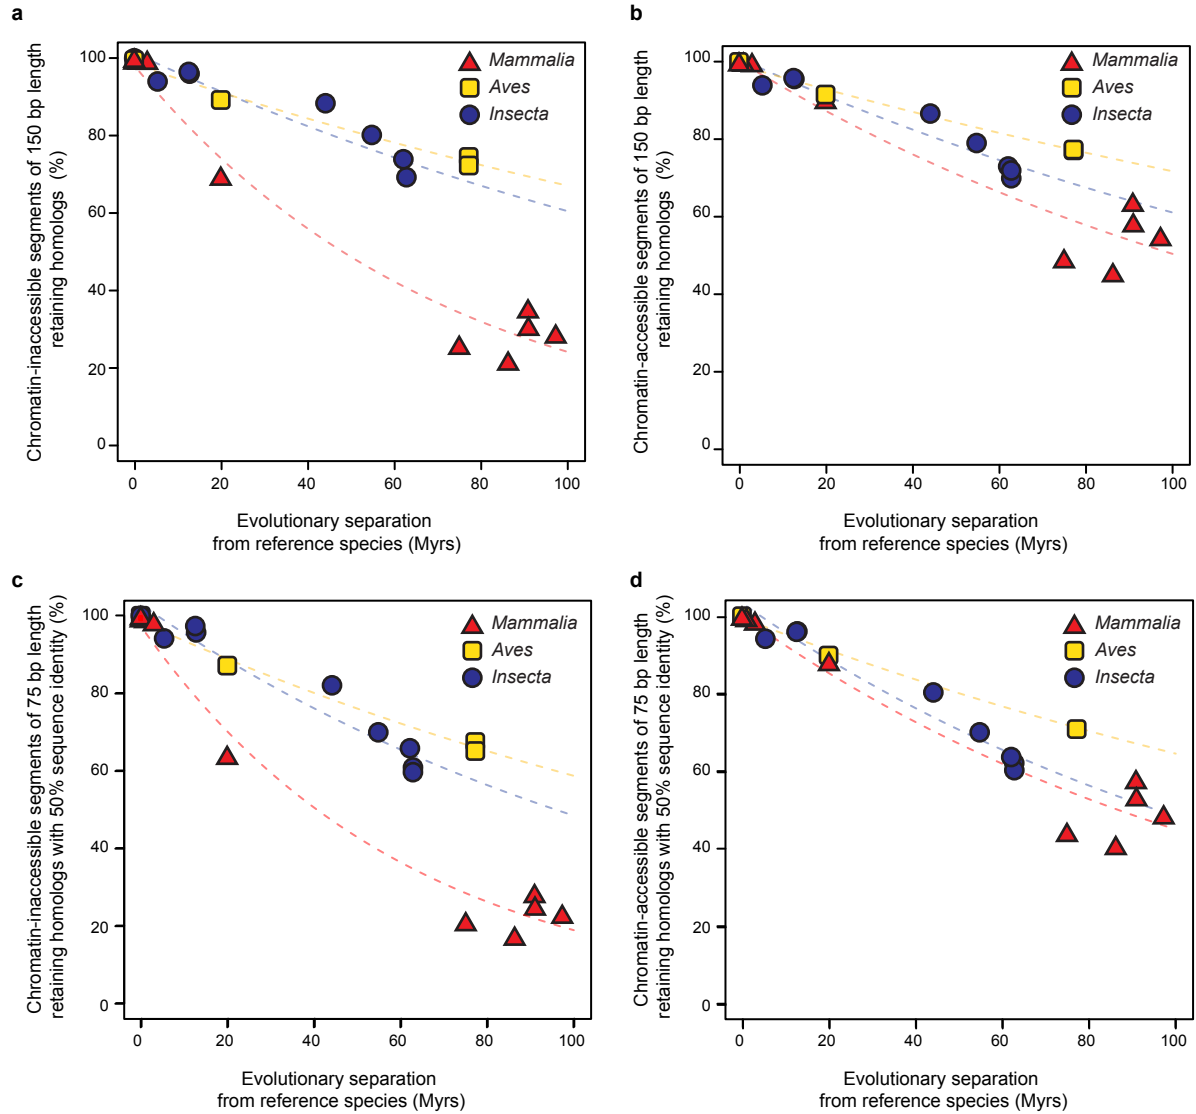

**Figure 5 - figure supplement 2 | Retention of intergenic genomic segments in accessible- and inaccessible- chromatin is robust to changes in sampled region size and sequence identity threshold.**

**a, b,** Repeating the procedure used in **Fig. 5c** and **Fig. 5d** sampling segments of different length (150 bp) and **c,d** increasing the LiftOver minMatch (0.5).
