# Supplementary material for: Химия соединений, закреплённых на минеральных носителях
Source: eLife journal article supplement (doi:10.7554/elife.11615), 1985-01-01
Supplement: supp [file elife-11615-supp-v1.zip]

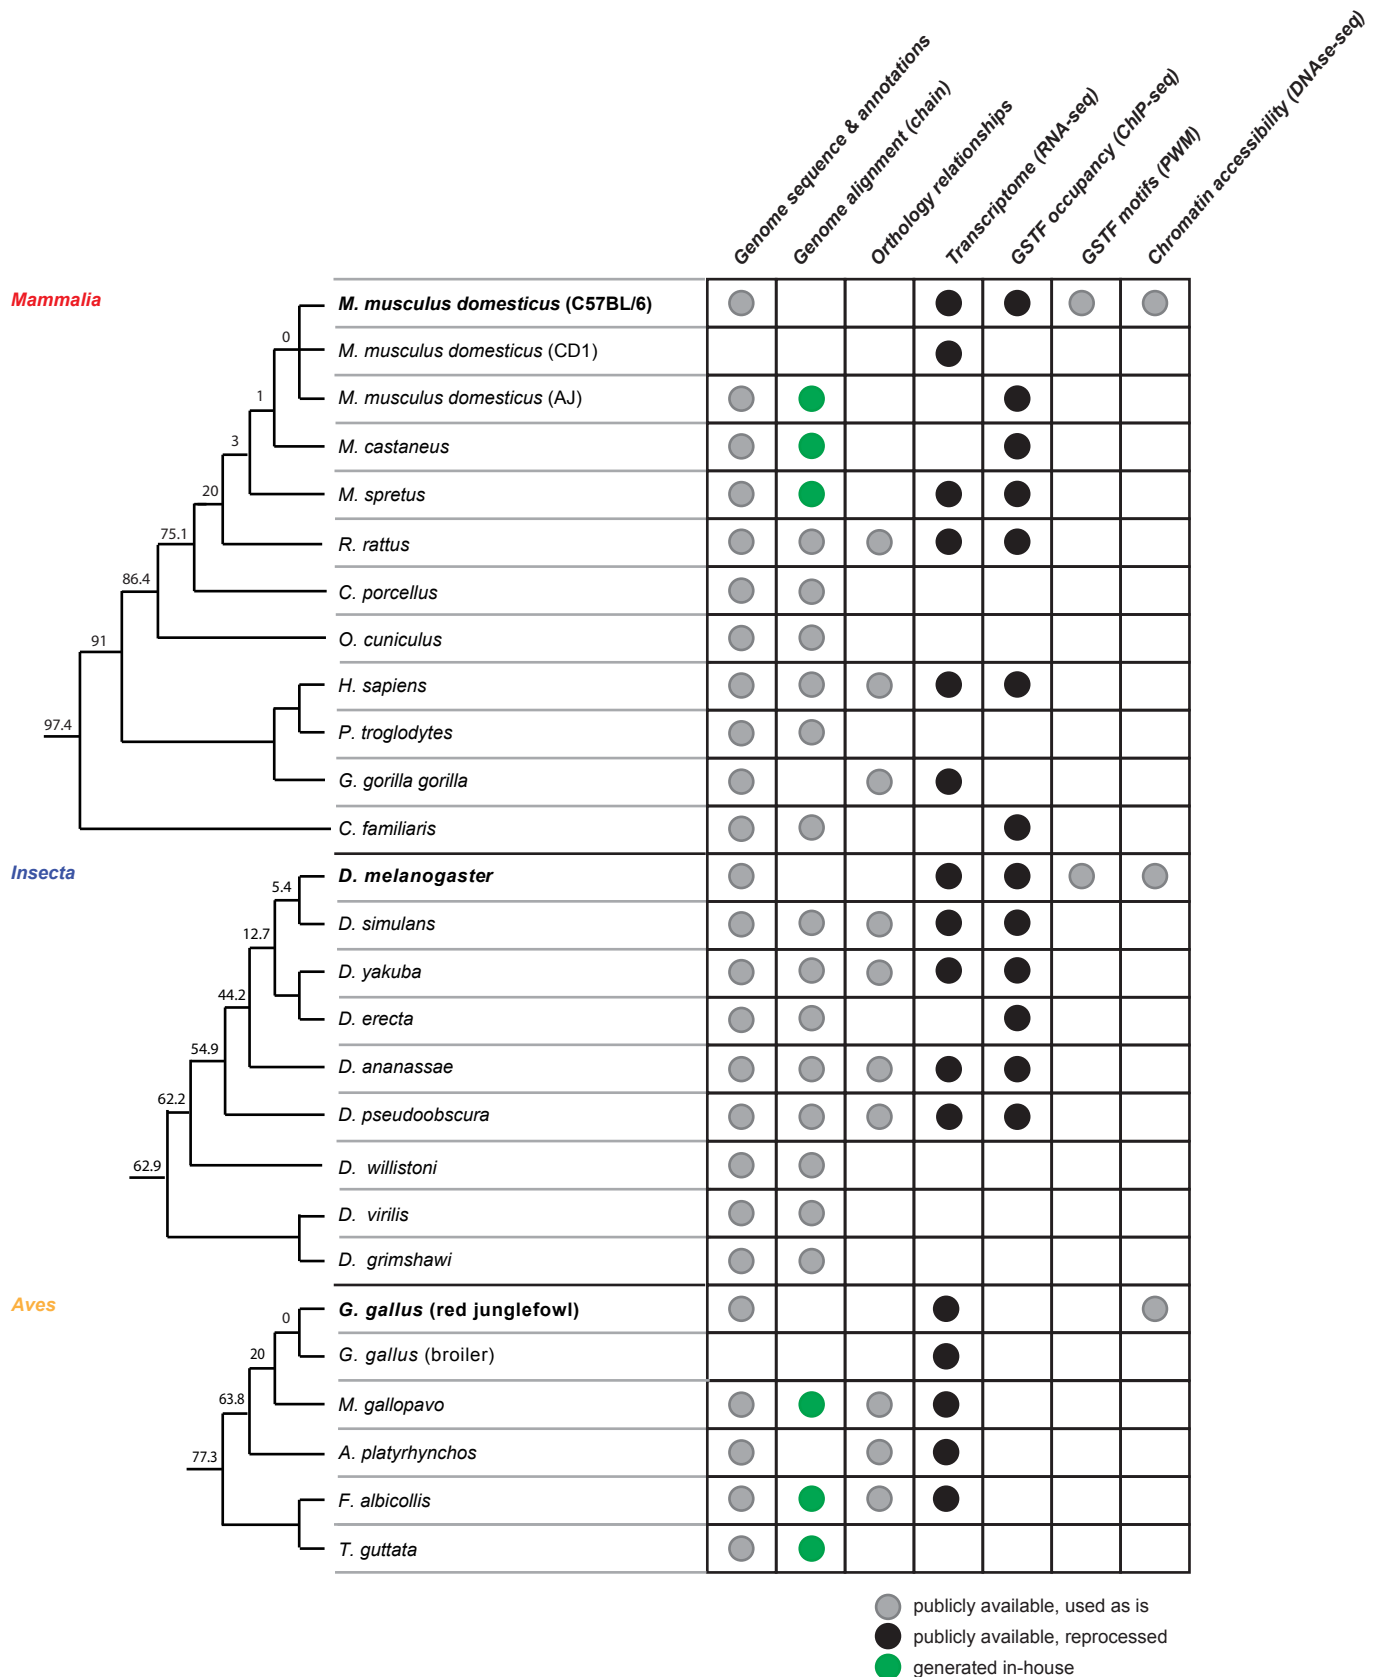

**Figure 1 - figure supplement 1 | Comparative genomics platform for studying transcriptional network evolution across three metazoan lineages.** The phylogenetic trees indicate the evolutionary relationships between the organisms included in this study. The trees are not drawn to scale. The

numbers at each branch split represent the evolutionary distance in Myrs separating the organisms at the end of the lower branch from the reference species, whose names are bolded.
