# Supplementary material for: Evidence for a common evolutionary rate in metazoan transcriptional networks
Source: eLife. 2015 Dec 18;4:e11615. doi: 10.7554/eLife.11615 (PMC4764585; doi:10.7554/eLife.11615)
Supplement: Supplementary file 1. — DOI: http://dx.doi.org/10.7554/eLife.11615.019 [file elife-11615-supp1.xlsx]

## Sheet: Sheet1
Lineage	GSTF	Peak caller	Quality filter	Sequence similarity filter	Reference subset	Overlap requirement	Study
Insects	GIANT	MACS	Relative	None	Pairwise-synteny	Stringent	Bradley et al. PLoS Biology, 2010
Insects	TWIST	MACS	Asymmetric	Stringent	All	Stringent	He et al. Nature Genetics, 2011
Insects	GIANT	MACS and Grizzly Peak	Lenient	None	Multiple choices	Lenient	Paris et al. PLoS Biology, 2013
Mammals	CEBPA, HNF4A	SWEMBL	Stringent	None	Super-synteny	Lenient	Schmidt et al. Science, 2010
Mammals	CEBPA, HNF4A, FOXA1	SWEMBL	Stringent	None	All	Lenient	Stefflova et al. Cell, 2013
