# Supplementary material for: Evidence for a common evolutionary rate in metazoan transcriptional networks
Source: eLife. 2015 Dec 18;4:e11615. doi: 10.7554/eLife.11615 (PMC4764585; doi:10.7554/eLife.11615)
Supplement: Supplementary file 2. — DOI: http://dx.doi.org/10.7554/eLife.11615.020 [file elife-11615-supp2.xlsx]

## Sheet: Sheet1
Tool	Mice parameters	Birds parameters	Description
lastZ	--notransition --nogapped --format=lav --hspthresh=6000 --step=100 --progress	--transition=1 --format=lav --hspthresh=3000 --gappedthresh=3000 --inner=2000 --masking=50	Generates pairwise alignments between chromosomes
lavToPsl	N/A	N/A	Converts lav format to psl format
axtChain	-linearGap=loose -psl	-linearGap=medium -minScore=3000 -psl	Chains alignments together
chainMergeSort | chainSplit	-lump=50	-lump=50	Combines sorted files into larger sorted files, and splits the chains by target/query sequence
chainNet	default	default	Makes alignment nets out of chains
netChainSubset	default	default	Creates a chain file with subset of chains that appear in the net
Custom python script to filter chains	chainscoremin=5000000000	not done	Filters chains to keep the best chain, one per chromosome -- only done with mouse alignments
